# Supplementary material for: Assessment of Electrospun Poly(ε-caprolactone) and Poly(lactic acid) Fiber Scaffolds to Generate 3D In Vitro Models of Colorectal Adenocarcinoma: A Preliminary Study
Source: MDPI journal article supplement (doi:10.3390/ijms24119443), 2023-05-29
Supplement: s1 [file s1]

**Table S1.** Statistical analyses concerning the porosity of the scaffolds.

| PCL      | 500 rpm | 1000 rpm | PLA      | 500 rpm | 1000 rpm |
|----------|---------|----------|----------|---------|----------|
| 1000 rpm | 0.066   | -        | 1000 rpm | < 0.001 | -        |
| 2500 rpm | < 0.001 | 0.003    | 2500 rpm | < 0.001 | < 0.001  |

  

| PCL vs. PLA | 500 rpm | 1000 rpm | 2500 rpm |
|-------------|---------|----------|----------|
|             | 0.002   | < 0.001  | < 0.001  |

**Table S2.** Statistical analyses concerning the pore sizes of the scaffolds.

| PCL      | 500 rpm | 1000 rpm | PLA      | 500 rpm | 1000 rpm |
|----------|---------|----------|----------|---------|----------|
| 1000 rpm | 0.11    | -        | 1000 rpm | < 0.001 | -        |
| 2500 rpm | 0.49    | 0.06     | 2500 rpm | < 0.001 | < 0.001  |

  

| PCL vs. PLA | 500 rpm | 1000 rpm | 2500 rpm |
|-------------|---------|----------|----------|
|             | < 0.001 | < 0.001  | 0.003    |

**Table S3.** Statistical analyses concerning the mechanical properties of the scaffolds.

| Statistical significance for the Tensile Strengths |         |          |          |         |          |
|----------------------------------------------------|---------|----------|----------|---------|----------|
| PCL                                                | 500 rpm | 1000 rpm | PLA      | 500 rpm | 1000 rpm |
| 1000 rpm                                           | 0.539   | -        | 1000 rpm | 0.122   | -        |
| 2500 rpm                                           | 0.005   | 0.016    | 2500 rpm | 0.015   | 0.014    |

  

| PCL vs. PLA | 500 rpm | 1000 rpm | 2500 rpm |
|-------------|---------|----------|----------|
|             | 0.006   | 0.006    | < 0.001  |

  

| Statistical significance for the Strain at break |         |          |          |         |          |
|--------------------------------------------------|---------|----------|----------|---------|----------|
| PCL                                              | 500 rpm | 1000 rpm | PLA      | 500 rpm | 1000 rpm |
| 1000 rpm                                         | 0.006   | -        | 1000 rpm | 0.668   | -        |
| 2500 rpm                                         | 0.001   | 0.149    | 2500 rpm | 0.432   | 0.612    |

  

| PCL vs. PLA | 500 rpm | 1000 rpm | 2500 rpm |
|-------------|---------|----------|----------|
|             | < 0.001 | < 0.001  | 0.001    |

  

| Statistical significance for the Young's Modulus |         |          |          |         |          |
|--------------------------------------------------|---------|----------|----------|---------|----------|
| PCL                                              | 500 rpm | 1000 rpm | PLA      | 500 rpm | 1000 rpm |
| 1000 rpm                                         | < 0.001 | -        | 1000 rpm | < 0.001 | -        |
| 2500 rpm                                         | 0.005   | 0.013    | 2500 rpm | 0.002   | 0.112    |

  

| PCL vs. PLA | 500 rpm | 1000 rpm | 2500 rpm |
|-------------|---------|----------|----------|
|             | 0.046   | 0.018    | 0.004    |

  

| Statistical significance for the Toughness |         |          |          |         |          |
|--------------------------------------------|---------|----------|----------|---------|----------|
| PCL                                        | 500 rpm | 1000 rpm | PLA      | 500 rpm | 1000 rpm |
| 1000 rpm                                   | 0.924   | -        | 1000 rpm | 0.147   | -        |
| 2500 rpm                                   | 0.051   | 0.096    | 2500 rpm | < 0.001 | 0.002    |

  

| PCL vs. PLA | 500 rpm | 1000 rpm | 2500 rpm |
|-------------|---------|----------|----------|
|             | < 0.001 | 0.048    | 0.009    |
